# Supplementary material for: Specific Gene Expression Responses to Parasite Genotypes Reveal Redundancy of Innate Immunity in Vertebrates
Source: PubMed Central journal article supplement (PMC4177871; doi:10.1371/journal.pone.0108001), 2014-09-25
Supplement: pone.0108001.s005.pdf [file pone.0108001.s005.pdf]

**Supplementary table S.5** Enriched GO terms. Shown are GO-terms (GO-ID, GO-term) of the group „Biological Process“ found to be overrepresented in a given test-set tested against the whole set of identified *G. aculeatus* genes. Given are number of genes per GO-term in test- (#Test) and reference-set (#Ref) with p-values and FDR corrections.

| test-set                            | GO-ID      | GO-term                                     | FDR      | p-value  | #Test | #Ref |
|-------------------------------------|------------|---------------------------------------------|----------|----------|-------|------|
| total up-regulated in head kidney   | GO:0032502 | developmental process                       | 2,46E-02 | 6,04E-04 | 101   | 4465 |
| total up-regulated in head kidney   | GO:0007275 | multicellular organismal development        | 2,69E-02 | 7,96E-04 | 96    | 4216 |
| total up-regulated in head kidney   | GO:0032501 | multicellular organismal process            | 2,69E-02 | 8,05E-04 | 96    | 4225 |
| total up-regulated in head kidney   | GO:0048869 | cellular developmental process              | 3,98E-02 | 1,54E-03 | 61    | 2455 |
| total up-regulated in head kidney   | GO:0030154 | cell differentiation                        | 3,98E-02 | 1,54E-03 | 61    | 2455 |
| total up-regulated in head kidney   | GO:0009653 | anatomical structure morphogenesis          | 3,98E-02 | 1,62E-03 | 58    | 2315 |
| total up-regulated in head kidney   | GO:0048856 | anatomical structure development            | 3,98E-02 | 1,63E-03 | 58    | 2317 |
| total down-regulated in head kidney | GO:0008152 | metabolic process                           | 4,53E-10 | 3,69E-12 | 182   | 7196 |
| total down-regulated in head kidney | GO:0009056 | catabolic process                           | 4,36E-08 | 4,74E-10 | 70    | 1875 |
| total down-regulated in head kidney | GO:0006629 | lipid metabolic process                     | 5,97E-05 | 1,14E-06 | 37    | 893  |
| total down-regulated in head kidney | GO:0009605 | response to external stimulus               | 7,57E-05 | 1,65E-06 | 46    | 1264 |
| total down-regulated in head kidney | GO:0005975 | carbohydrate metabolic process              | 3,82E-03 | 1,24E-04 | 25    | 627  |
| total down-regulated in head kidney | GO:0019748 | secondary metabolic process                 | 9,22E-03 | 3,38E-04 | 8     | 94   |
| total down-regulated in head kidney | GO:0006950 | response to stress                          | 9,22E-03 | 3,51E-04 | 58    | 2144 |
| total up-regulated in gill          | GO:0032502 | developmental process                       | 1,13E-18 | 6,12E-21 | 340   | 4226 |
| total up-regulated in gill          | GO:0032501 | multicellular organismal process            | 4,70E-18 | 3,83E-20 | 324   | 3997 |
| total up-regulated in gill          | GO:0007275 | multicellular organismal development        | 5,03E-18 | 5,46E-20 | 323   | 3989 |
| total up-regulated in gill          | GO:0050789 | regulation of biological process            | 4,76E-13 | 1,16E-14 | 455   | 6800 |
| total up-regulated in gill          | GO:0065007 | biological regulation                       | 1,20E-12 | 3,26E-14 | 459   | 6916 |
| total up-regulated in gill          | GO:0009653 | anatomical structure morphogenesis          | 2,36E-10 | 9,12E-12 | 184   | 2189 |
| total up-regulated in gill          | GO:0048856 | anatomical structure development            | 2,36E-10 | 9,82E-12 | 184   | 2191 |
| total up-regulated in gill          | GO:0007010 | cytoskeleton organization                   | 2,36E-10 | 1,03E-11 | 79    | 652  |
| total up-regulated in gill          | GO:0050896 | response to stimulus                        | 3,56E-10 | 1,64E-11 | 352   | 5120 |
| total up-regulated in gill          | GO:0048869 | cellular developmental process              | 4,10E-10 | 2,12E-11 | 191   | 2325 |
| total up-regulated in gill          | GO:0030154 | cell differentiation                        | 4,10E-10 | 2,12E-11 | 191   | 2325 |
| total up-regulated in gill          | GO:0016043 | cellular component organization             | 4,87E-09 | 3,05E-10 | 265   | 3664 |
| total up-regulated in gill          | GO:0071840 | cellular component organization or biogene  | 4,87E-09 | 3,05E-10 | 265   | 3664 |
| total up-regulated in gill          | GO:0007165 | signal transduction                         | 3,72E-08 | 2,59E-09 | 257   | 3604 |
| total up-regulated in gill          | GO:0009790 | embryo development                          | 3,72E-08 | 2,66E-09 | 107   | 1142 |
| total up-regulated in gill          | GO:0051716 | cellular response to stimulus               | 3,72E-08 | 2,66E-09 | 257   | 3605 |
| total up-regulated in gill          | GO:0050794 | regulation of cellular process              | 3,72E-08 | 2,73E-09 | 257   | 3606 |
| total up-regulated in gill          | GO:0009605 | response to external stimulus               | 2,21E-07 | 1,80E-08 | 108   | 1202 |
| total up-regulated in gill          | GO:0023052 | signaling                                   | 4,52E-06 | 4,79E-07 | 267   | 4006 |
| total up-regulated in gill          | GO:0009719 | response to endogenous stimulus             | 1,78E-05 | 1,94E-06 | 67    | 704  |
| total up-regulated in gill          | GO:0006464 | cellular protein modification process       | 1,95E-05 | 2,22E-06 | 144   | 1923 |
| total up-regulated in gill          | GO:0043412 | macromolecule modification                  | 1,95E-05 | 2,22E-06 | 144   | 1923 |
| total up-regulated in gill          | GO:0006996 | organelle organization                      | 3,56E-05 | 4,16E-06 | 133   | 1763 |
| total up-regulated in gill          | GO:0071841 | cellular component organization or biogene  | 3,89E-05 | 4,76E-06 | 133   | 1768 |
| total up-regulated in gill          | GO:0071842 | cellular component organization at cellular | 3,89E-05 | 4,76E-06 | 133   | 1768 |
| total up-regulated in gill          | GO:0009987 | cellular process                            | 1,26E-04 | 1,58E-05 | 504   | 8771 |
| total up-regulated in gill          | GO:0008283 | cell proliferation                          | 5,11E-04 | 7,08E-05 | 88    | 1127 |
| total up-regulated in gill          | GO:0008219 | cell death                                  | 6,20E-04 | 8,76E-05 | 101   | 1347 |
| total up-regulated in gill          | GO:0016265 | death                                       | 6,58E-04 | 9,47E-05 | 101   | 1350 |
| total up-regulated in gill          | GO:0044267 | cellular protein metabolic process          | 7,81E-03 | 1,23E-03 | 150   | 2319 |
| total up-regulated in gill          | GO:0006950 | response to stress                          | 1,75E-02 | 2,99E-03 | 133   | 2069 |
| total up-regulated in gill          | GO:0019538 | protein metabolic process                   | 2,61E-02 | 4,68E-03 | 185   | 3045 |
| total down-regulated in gill        | GO:0006091 | generation of precursor metabolites and en  | 9,69E-03 | 6,83E-05 | 16    | 386  |
