# Supplementary material for: Specific Gene Expression Responses to Parasite Genotypes Reveal Redundancy of Innate Immunity in Vertebrates
Source: PubMed Central journal article supplement (PMC4177871; doi:10.1371/journal.pone.0108001), 2014-09-25
Supplement: pone.0108001.s007.pdf [file pone.0108001.s007.pdf]

**Supplementary table S.7** Differentially expressed immune-related genes in gill tissue of *G. aculeatus*. Shown are differentially expressed genes and their corresponding treatment, including FPKM values for control (control\_val) and treatment (treatment\_val). The log2-fold change shows if there is up- or down-regulation of a given gene due to the parasite treatment. Only significant differences shown.

| gene               | treatment | control_val | treatment_val | log2(fold_change) |
|--------------------|-----------|-------------|---------------|-------------------|
| GATA2 (1 of 2)     | clone I   | 110,657     | 64,4838       | -0,779088         |
| CASP3 (4 of 4)     | clone I   | 450,008     | 269,981       | -0,73709          |
| F11R               | clone I   | 282,828     | 187,116       | -0,595993         |
| EPHA2 (1 of 2)     | clone I   | 24,5537     | 18,464        | -0,411225         |
| COL1A1 (2 of 2)    | clone I   | 120,383     | 195,736       | 0,701278          |
| C4A                | clone I   | 26,6354     | 44,8943       | 0,753185          |
| PIK3R1 (1 of 2)    | clone I   | 32,8272     | 76,9047       | 1,22818           |
| NFKBIA (1 of 2)    | clone I   | 101,293     | 256,941       | 1,3429            |
| CCR9 (1 of 2)      | clone I   | 15,7446     | 43,8927       | 1,47913           |
| THBS1 (2 of 2)     | clone I   | 2,65074     | 14,2046       | 2,42189           |
| SOCS3 (1 of 2)     | clone I   | 25,2321     | 151,034       | 2,58154           |
| PFDN1              | clone mix | 113,611     | 33,5984       | -1,75764          |
| EXOSC5             | clone mix | 89,0188     | 28,0065       | -1,66835          |
| ATG12              | clone mix | 50,5042     | 16,175        | -1,64264          |
| ELMOD2             | clone mix | 99,0101     | 47,3581       | -1,06397          |
| ENSGACG00000000336 | clone mix | 646,991     | 391,739       | -0,723854         |
| PRDX3              | clone mix | 128,492     | 87,3783       | -0,556329         |
| DCTN1 (2 of 2)     | clone mix | 21,9148     | 35,4999       | 0,695912          |
| ZC3HAV1            | clone mix | 57,9356     | 102,987       | 0,829933          |
| CHUK (1 of 2)      | clone mix | 15,6785     | 28,4516       | 0,859719          |
| PKHD1L1            | clone mix | 3,33013     | 6,26935       | 0,912738          |
| PRKDC              | clone mix | 5,5653      | 11,5522       | 1,05364           |
| CXCL12 (2 of 2)    | clone mix | 180,438     | 381,163       | 1,0789            |
| VAV3 (2 of 2)      | clone mix | 7,66529     | 16,7189       | 1,12506           |
| MYO9B (1 of 2)     | clone mix | 11,7707     | 25,8328       | 1,134             |
| KLC1               | clone mix | 10,2467     | 22,7065       | 1,14795           |
| MINK1              | clone mix | 12,5942     | 27,9295       | 1,14903           |
| FGFR2              | clone mix | 38,7514     | 87,4171       | 1,17367           |
| TRPM4 (2 of 2)     | clone mix | 16,1638     | 36,749        | 1,18494           |
| LYST               | clone mix | 2,52577     | 5,75517       | 1,18814           |
| ROCK1              | clone mix | 19,4466     | 44,4478       | 1,1926            |
| JAK1               | clone mix | 42,4953     | 97,2966       | 1,19508           |
| IL6ST              | clone mix | 19,5226     | 44,7802       | 1,19771           |
| CHD7               | clone mix | 6,55623     | 15,0938       | 1,20302           |
| PIK3CB             | clone mix | 18,7046     | 43,1989       | 1,2076            |
| TGFBR3             | clone mix | 15,8447     | 36,6134       | 1,20837           |
| MALT1              | clone mix | 5,48002     | 12,6746       | 1,20969           |
| AP3D1              | clone mix | 10,9076     | 25,3267       | 1,21533           |
| TCF3 (1 of 2)      | clone mix | 12,5922     | 29,3723       | 1,22193           |
| NCOA6              | clone mix | 6,04059     | 14,0976       | 1,22269           |
| NLRC5              | clone mix | 7,72544     | 18,1536       | 1,23256           |
| MAPK14 (1 of 2)    | clone mix | 36,8271     | 86,8727       | 1,23813           |
| RICTOR             | clone mix | 7,93354     | 18,8267       | 1,24674           |
| C3 (6 of 8)        | clone mix | 2,23888     | 5,32882       | 1,25104           |
| ACIN1              | clone mix | 21,5025     | 51,4822       | 1,25957           |
| PRKCA (2 of 2)     | clone mix | 7,20845     | 17,3013       | 1,26312           |
| PSME4 (1 of 2)     | clone mix | 11,7679     | 28,8033       | 1,29137           |
| C3 (8 of 8)        | clone mix | 1,66511     | 4,16296       | 1,32199           |
| PIK3CG             | clone mix | 7,73283     | 19,6629       | 1,34641           |
| C4A                | clone mix | 26,6354     | 68,1728       | 1,35585           |
| COL1A1 (2 of 2)    | clone mix | 120,383     | 312,219       | 1,37493           |
| PDE1B              | clone mix | 11,871      | 30,8535       | 1,37799           |
| MAP4K2             | clone mix | 10,3164     | 27,0149       | 1,38881           |
| ENSGACG00000001919 | clone mix | 118,854     | 316,304       | 1,41213           |
| MLL                | clone mix | 3,41602     | 9,25116       | 1,43732           |
| SLC11A2 (1 of 2)   | clone mix | 8,2926      | 22,76         | 1,45661           |
| TNRC6C (2 of 2)    | clone mix | 2,86844     | 7,96076       | 1,47264           |
| EP300 (1 of 2)     | clone mix | 3,93953     | 10,9489       | 1,47468           |
| EGR1               | clone mix | 17,677      | 49,5211       | 1,48617           |
| ITCH (2 of 2)      | clone mix | 4,34254     | 12,3402       | 1,50676           |
| CYSLTR2            | clone mix | 8,98739     | 25,6988       | 1,51573           |
| JAG2               | clone mix | 3,96985     | 11,4035       | 1,52232           |
| TGFB1              | clone mix | 19,2995     | 56,4909       | 1,54946           |
| SWAP70 (1 of 2)    | clone mix | 25,7638     | 75,9629       | 1,55995           |
| C7 (2 of 2)        | clone mix | 11,3621     | 34,368        | 1,59683           |
| SKIL               | clone mix | 5,59669     | 17,1667       | 1,61697           |
| PTPN1              | clone mix | 12,4365     | 38,4085       | 1,62685           |
| PREX1              | clone mix | 7,1903      | 22,6468       | 1,65518           |
| MECOM              | clone mix | 2,79049     | 8,89955       | 1,67321           |
| KLF6 (1 of 2)      | clone mix | 38,6488     | 127,676       | 1,72399           |
| THRA (1 of 2)      | clone mix | 6,17339     | 20,5508       | 1,73506           |
| IGF1R (2 of 2)     | clone mix | 3,76793     | 12,7508       | 1,75874           |
| SLC16A1 (1 of 2)   | clone mix | 10,4441     | 35,4457       | 1,76292           |
| PGLYRP2 (1 of 2)   | clone mix | 12,1395     | 43,2742       | 1,83379           |
| SFRP2              | clone mix | 14,8646     | 53,0794       | 1,83627           |
| MKNK2              | clone mix | 61,4839     | 221,94        | 1,85189           |
| COL1A2             | clone mix | 67,0945     | 252,776       | 1,9136            |
| COLEC12 (2 of 2)   | clone mix | 6,56252     | 25,2012       | 1,94117           |
| TINAGL1            | clone mix | 18,6589     | 74,4725       | 1,99684           |
| FN1 (2 of 2)       | clone mix | 5,47172     | 21,9932       | 2,00699           |
| DAB2               | clone mix | 5,07582     | 20,4465       | 2,01014           |
| CCR9 (1 of 2)      | clone mix | 15,7446     | 65,1434       | 2,04877           |
| HDAC4 (1 of 2)     | clone mix | 3,84143     | 15,899        | 2,04922           |
| EDN2               | clone mix | 9,09681     | 37,761        | 2,05346           |
| SRF (2 of 2)       | clone mix | 2,85015     | 11,9942       | 2,07322           |
| PIK3R1 (1 of 2)    | clone mix | 32,8272     | 138,861       | 2,08068           |
| FN1 (1 of 2)       | clone mix | 11,812      | 50,042        | 2,08289           |
| JUNB (2 of 2)      | clone mix | 15,1382     | 66,1757       | 2,1281            |
| ITGA1              | clone mix | 8,11723     | 35,7251       | 2,13788           |
| NFKBIA (1 of 2)    | clone mix | 101,293     | 453,214       | 2,16166           |
| ITGA5 (1 of 2)     | clone mix | 1,8522      | 8,67928       | 2,22833           |
| PODXL              | clone mix | 6,93071     | 32,6175       | 2,23457           |
| KIF3C (1 of 2)     | clone mix | 2,13274     | 10,4545       | 2,29334           |
| JUNB (1 of 2)      | clone mix | 22,0675     | 136,157       | 2,62527           |
| DUSP6              | clone mix | 8,66461     | 56,9579       | 2,71669           |
| SOCS3 (2 of 2)     | clone mix | 8,34668     | 65,733        | 2,97734           |
| ADAM8 (1 of 2)     | clone mix | 1,99632     | 15,7632       | 2,98115           |
| THBS1 (2 of 2)     | clone mix | 2,65074     | 34,9675       | 3,72154           |
| SOCS3 (1 of 2)     | clone mix | 25,2321     | 334,289       | 3,72776           |
| ITGB1 (1 of 2)     | clone XII | 35,9397     | 55,5941       | 0,629352          |
| C4A                | clone XII | 26,6354     | 59,4999       | 1,15954           |
| DAB2               | clone XII | 5,07582     | 14,08         | 1,47193           |
| C6                 | clone XII | 3,91636     | 10,9939       | 1,48911           |
| SLC3A2 (2 of 2)    | clone XII | 57,6051     | 203,394       | 1,82001           |
| JUNB (2 of 2)      | clone XII | 15,1382     | 63,0149       | 2,0575            |
| SOCS3 (2 of 2)     | clone XII | 8,34668     | 47,5986       | 2,51164           |
| ITGA5 (1 of 2)     | clone XII | 1,8522      | 12,0105       | 2,69698           |
| ADAM8 (1 of 2)     | clone XII | 1,99632     | 14,0493       | 2,81508           |
| SOCS3 (1 of 2)     | clone XII | 25,2321     | 250,36        | 3,31067           |
| THBS1 (2 of 2)     | clone XII | 2,65074     | 34,5915       | 3,70595           |
